# Supplementary material
Source: MDPI journal article supplement (https://www.mdpi.com/2076-3417/10/18/6450)
Supplement: s1 [file s1]

## Supplementary Materials: Oral Microbiome of the Healthy Japanese Older People at the Age of 90

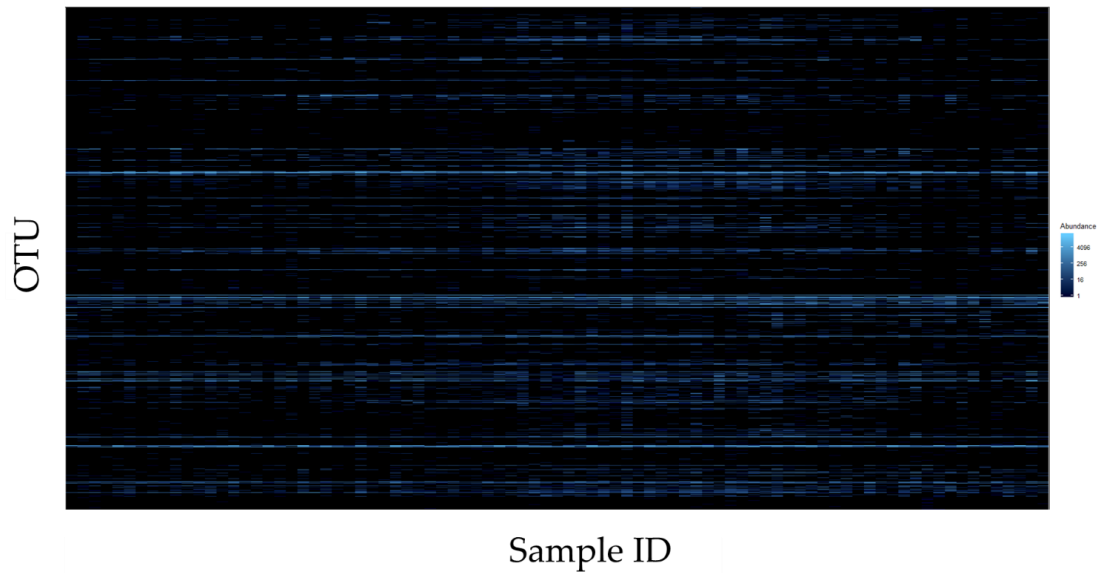

Figure S1. Heatmap by 1,216 species detected in this study.

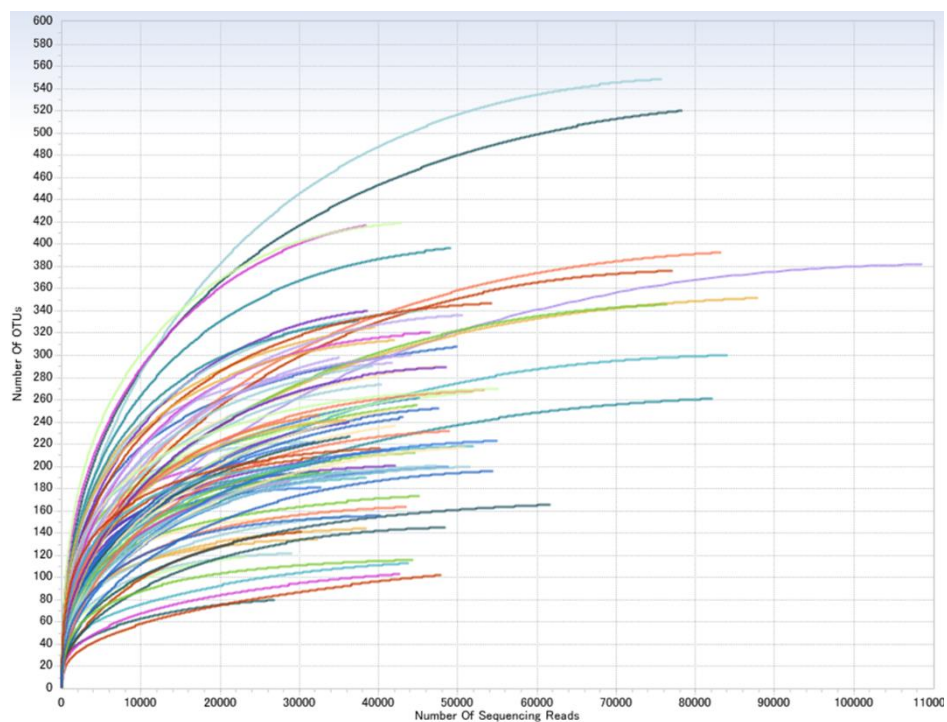

Figure S2. Rarefaction curves of the 85 subjects.

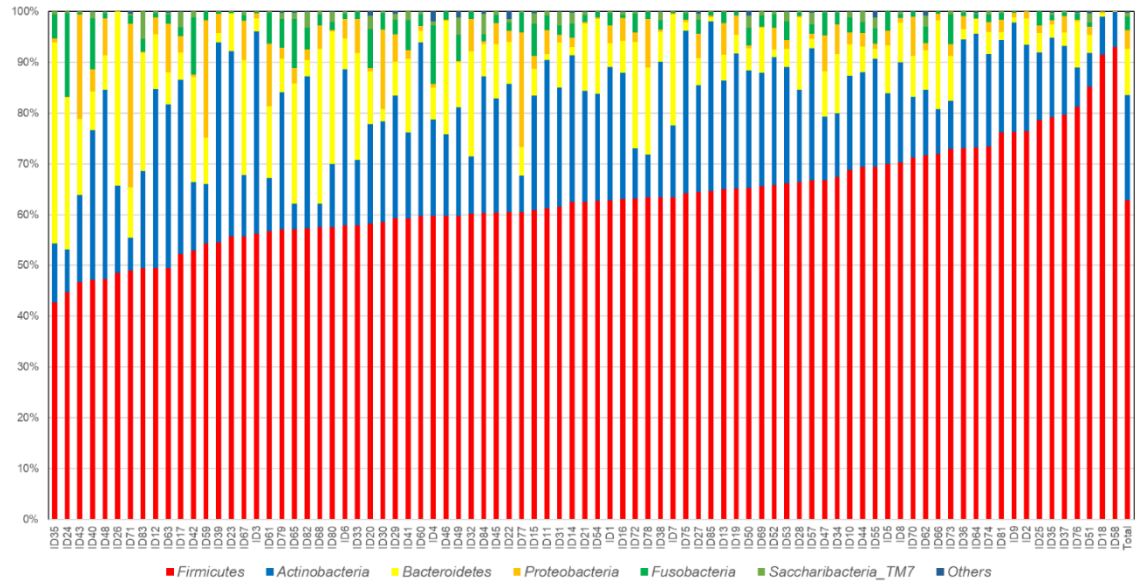

**Figure S3.** The composition bar plots for each subjects at phylum levels.

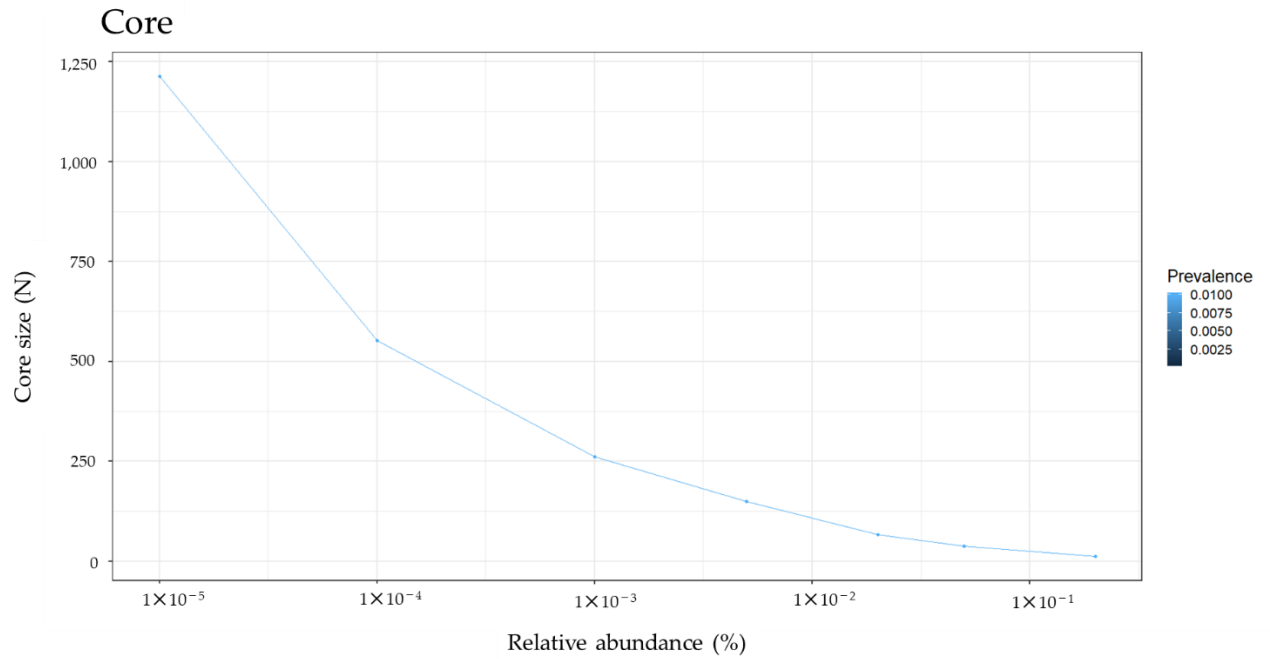

**Figure S4.** Core line plot.

**Table S1.** Alpha diversity indices.

|             | Mean +/- SD       | Median(25 <sup>th</sup> –75 <sup>th</sup> ) | Minimum, Maximum |
|-------------|-------------------|---------------------------------------------|------------------|
| Valid reads | 45,874 +/- 15,603 | 42915 (36,396–49,828)                       | 23,272–108,597   |
| OTUs        | 237 +/- 84        | 222 (184–288)                               | 80–512           |
| Ace         | 251 +/- 87        | 243 (194–313)                               | 90–529           |
| Chao1       | 244 +/- 85        | 230 (189–301)                               | 83–514           |
| Jack Knife  | 260 +/- 91        | 247 (202–323)                               | 92–552           |
| Shannon     | 3.01 +/- 0.46     | 3.07 (2.71–3.32)                            | 1.21–4.01        |
| Simpson     | 0.1 +/- 0.07      | 0.09 (0.07–0.12)                            | 0.04–0.53        |
